# Supplementary material for: Lactobacillus plantarum 23-1 improves intestinal inflammation and barrier function through the TLR4/NF-κB signaling pathway in obese mice
Source: Royal Society of Chemistry journal article supplement (doi:10.1039/d1fo04316a), 2022-01-01
Supplement: d1fo04316a1.pdf [file d1fo04316a1.pdf]

## Supplementary materials

Tab. S1 Probiotic characteristics of LAB

| Strains                | Simulated gastric digestion (%) | Simulated intestinal digestion (%) | Surface hydrophobicity (%) | Adhesive rate (%)       | Cholesterol removal rate (%) |
|------------------------|---------------------------------|------------------------------------|----------------------------|-------------------------|------------------------------|
| <i>L. lactis</i> 102-1 | 42.50±1.09 <sup>b</sup>         | 47.53±0.79 <sup>b</sup>            | 61.13±1.05 <sup>a</sup>    | 48.35±0.83 <sup>c</sup> | 42.75±1.02 <sup>b</sup>      |
| LP 23-1                | 57.32±1.24 <sup>a</sup>         | 56.37±1.15 <sup>a</sup>            | 64.86±1.21 <sup>a</sup>    | 73.24±0.89 <sup>a</sup> | 52.43±0.89 <sup>a</sup>      |
| LP 1.0314              | 37.36±0.95 <sup>c</sup>         | 40.37±1.04 <sup>c</sup>            | 49.73±0.94 <sup>b</sup>    | 61.74±0.58 <sup>b</sup> | 21.36±0.75 <sup>d</sup>      |
| LP 1.0624              | 55.65±0.72 <sup>a</sup>         | 45.20±0.75 <sup>b</sup>            | 37.85±0.86 <sup>c</sup>    | 65.27±1.16 <sup>b</sup> | 36.83±0.91 <sup>c</sup>      |

Note: The simulated gastric digestion test was incubated in the simulated gastric fluid (pepsin: 3 g/L, pH 2.5) for 3 h.

The simulated intestinal digestion test was incubated in the simulated intestinal fluid (pancreatin: 1 g/L and bile salts: 3 g/L, pH 8.0) for 3 h.

*L. lactis* 102-1 (*Lactococcus lactis* 102-1), LP 23-1 (*Lactobacillus plantarum* 23-1), LP 1.0314 (*Lactobacillus plantarum* 1.0314) and LP 1.0624 (*Lactobacillus plantarum* 1.0624).

All data are expressed as the mean ± SD. Different letters indicate significant differences ( $P < 0.05$ ) in the same column line.

Tab. S2. The ingredients of the diets

| Ingredients                           | D12450B Normal diet (g/100 g) | D12492 High fat diet (g/100 g) |
|---------------------------------------|-------------------------------|--------------------------------|
| Casein                                | 20.00                         | 20.00                          |
| L-Cystine                             | 0.30                          | 0.30                           |
| Corn Starch                           | 31.50                         | 0                              |
| Maltodextrin                          | 3.50                          | 12.50                          |
| Sucrose                               | 35.00                         | 6.88                           |
| Cellulose                             | 5.00                          | 5.00                           |
| Soybean Oil                           | 2.50                          | 2.50                           |
| Lard                                  | 2.00                          | 24.5                           |
| Mineral Mix                           | 1.00                          | 1.00                           |
| Dicalcium phosphate                   | 1.30                          | 1.30                           |
| Calcium Carbonate                     | 0.55                          | 0.55                           |
| Potassium Citrate, 1 H <sub>2</sub> O | 1.65                          | 1.65                           |
| Vitamin Mix                           | 1.00                          | 1.00                           |
| Choline Bitartrate                    | 0.20                          | 0.20                           |

Tab. S3 Primer sequence

| Gene      | Forward primer (5' to 3') | Reverse primer (5' to 3') |
|-----------|---------------------------|---------------------------|
| FABP      | CATCCGGTCAGAGAGTACTTTT    | TAGGGTTATGATGCTCTTCACC    |
| FATP4     | GGTTACCTGTACTIONCCGAGATC  | CCTTTTTCAAGGTCTGTGCAAA    |
| CD36      | CTTTGAAAGAACTCTTGTGGGG    | GTCTGTGCCATTAATCATGTCG    |
| FFAR3     | CCTGCTGCTGTTCTGCCTTTC     | GCGGTGAGATAGATGGTGGTGAA   |
| G         |                           |                           |
| TLR-4     | GCCATCATTATGAGTGCCAATT    | AGGGATAAGAACGCTGAGAATT    |
| NF-κB     | CAAAGACAAAGAGGAAGTGCAA    | GATGGAATGTAATCCCACCGTA    |
| IκB-α     | TATTTGAAACTGGAAGCAGC      | CCGGAAGAAAAGCTGTAAACAT    |
| ZO-1      | CTGGTGAAGTCTCGGAAAAATG    | CATCTCTTGCTGCCAAACTATC    |
| Occludin  | CAGGATGCCAATTACCATCAAG    | GGGTTCACTCCCATTATGTACA    |
| Claudin-1 | AGATACAGTGCAAAGTCTTCGA    | CAGGATGCCAATTACCATCAAG    |
| Muc2      | CGAGCACATCACCTACCACATCAT  | TCCAGAATCCAGCCAGCCAGTC    |
| C         |                           |                           |
| β-actin   | GACCTCTATGCCAACACAGT      | CACCAATCCACACAGAGTAC      |

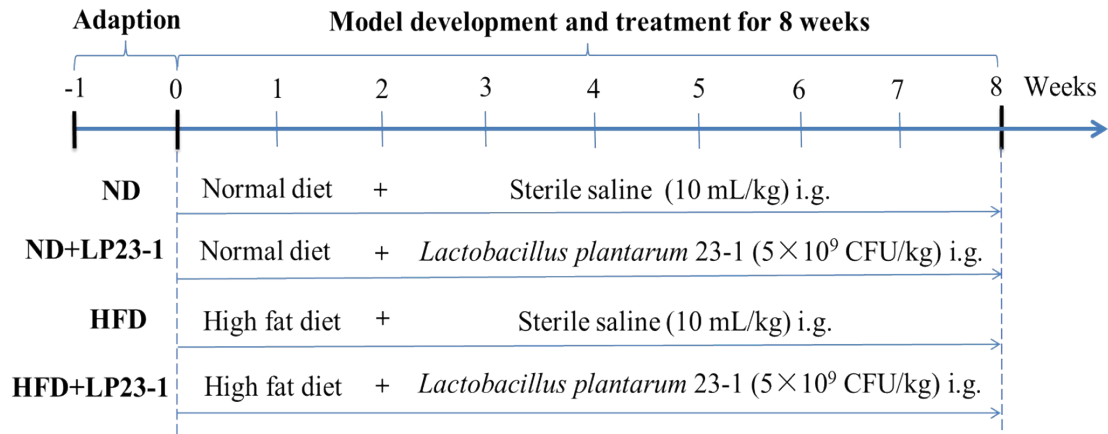

Fig. S1 Design of animal experiment. i.g.: Intra-gastric gavage. Treatment once a day for 8 weeks.
